# Supplementary material for: SARS CoV-2 (Delta Variant) Infection Kinetics and Immunopathogenesis in Domestic Cats
Source: MDPI journal article supplement (doi:10.3390/v14061207), 2022-06-01
Supplement: s1 [file s1]

## Supplementary Figures

Figure S1. Timeline of *in vivo* studies

Figure S2. Clustering dendrogram of RNA Seq samples

Figure S3. Clinical signs of SARS-CoV-2 cats by inoculation route

Figure S4. Nasal swab cultures

Figure S5. Histologic and immunofluorescent scoring of lung tissues in SARS-CoV-2 infected animals.

Figure S6. SARS-CoV-2 viral loads in necropsy tissues by inoculation route

Figure S7. Feline ACE2 expression in necropsy tissues by inoculation route

Figure S8A-C. Differentially expressed genes in control and CoV-2+ lung samples

Figure S9. Gene modules detection by weighted correlation network analysis (WGCNA) analysis

Figure S10A-D. KEGG pathway and gene ontology term enrichment

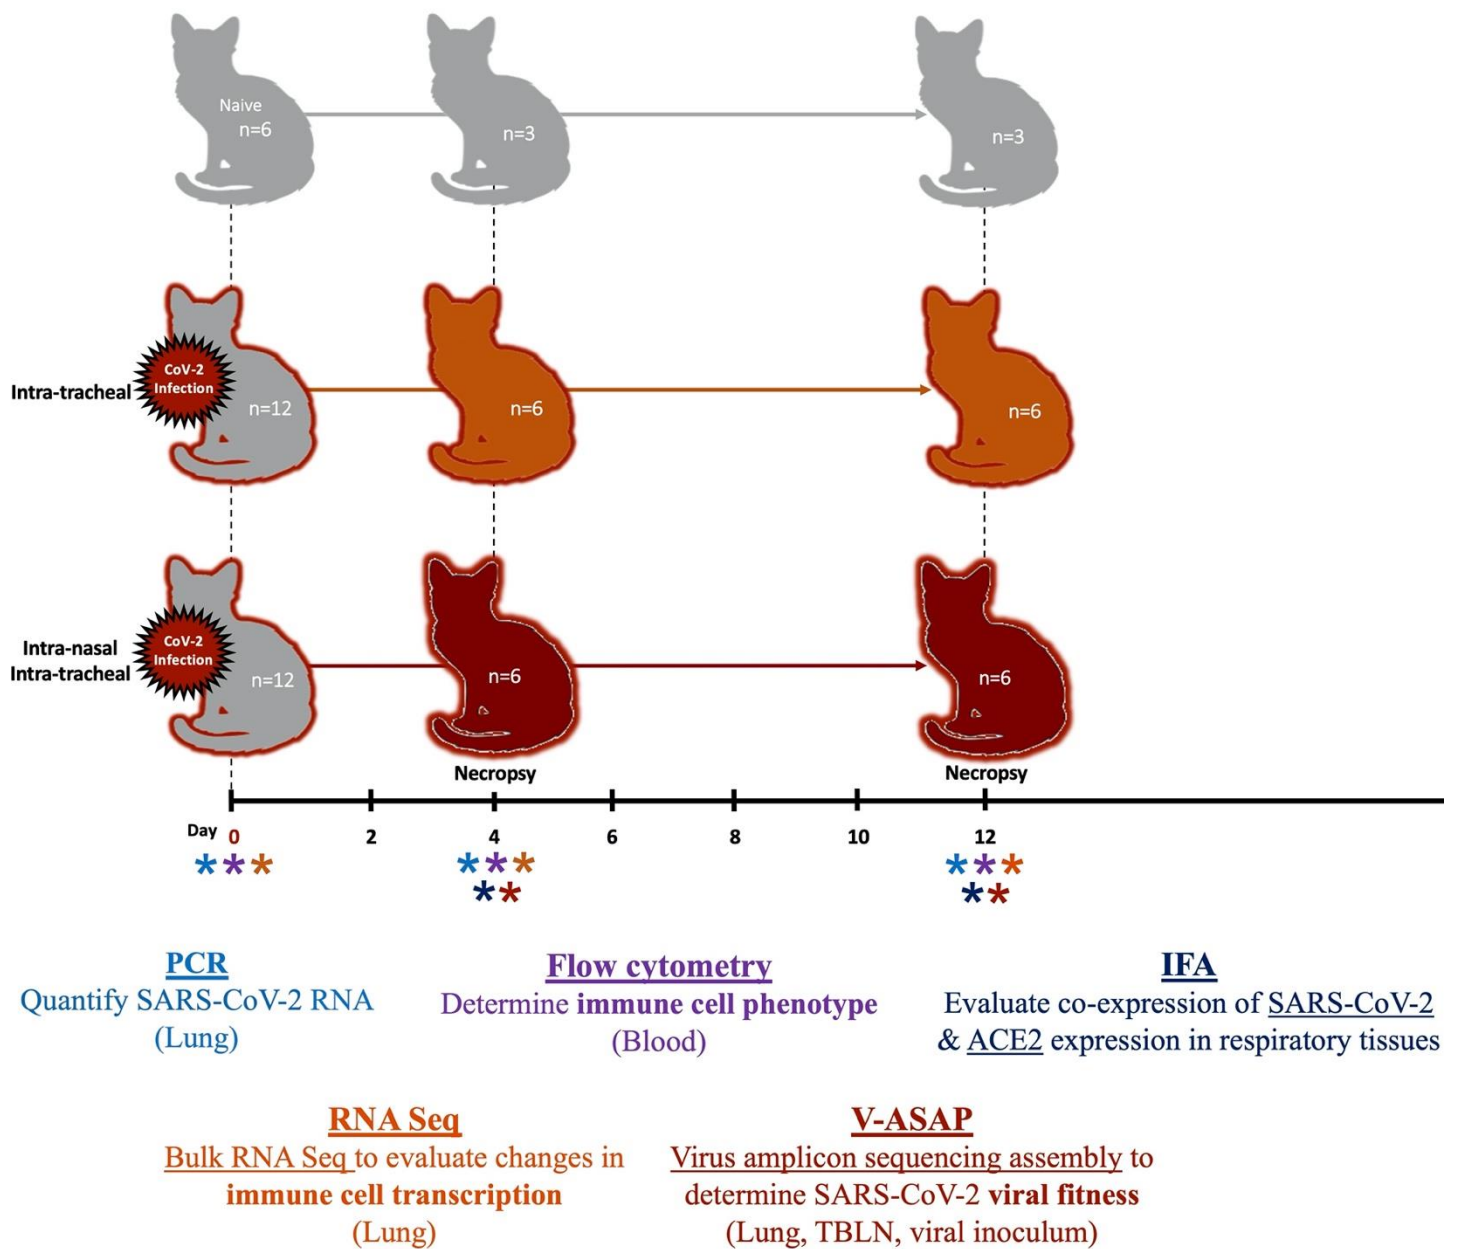

Figure S1. Timeline of *in vivo* studies

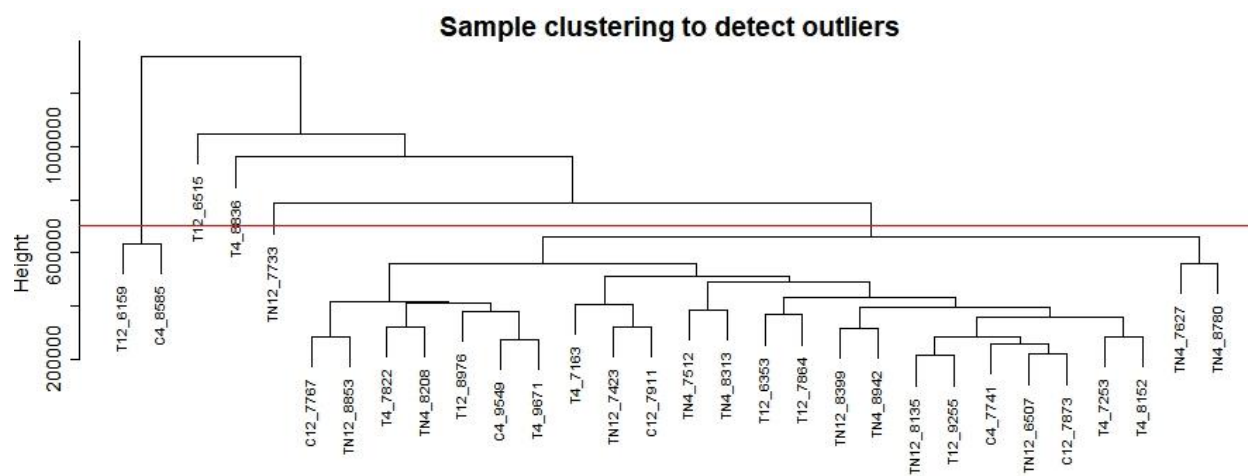

**Figure S2. Clustering dendrogram of 30 samples based on their Euclidean distance. Samples are filtered for downstream analysis with a height set of 700,000.**

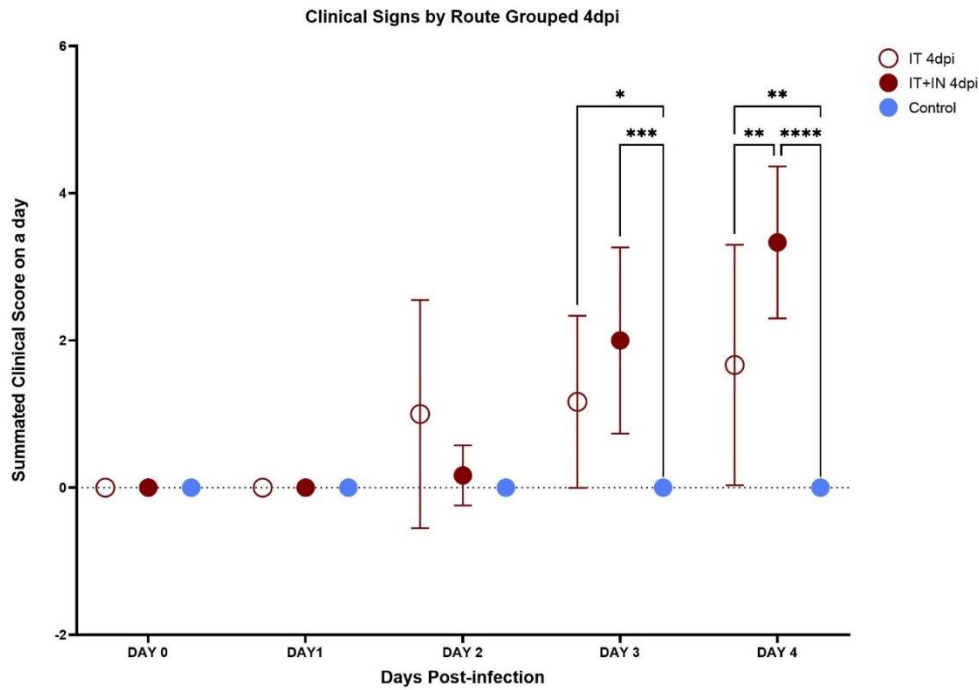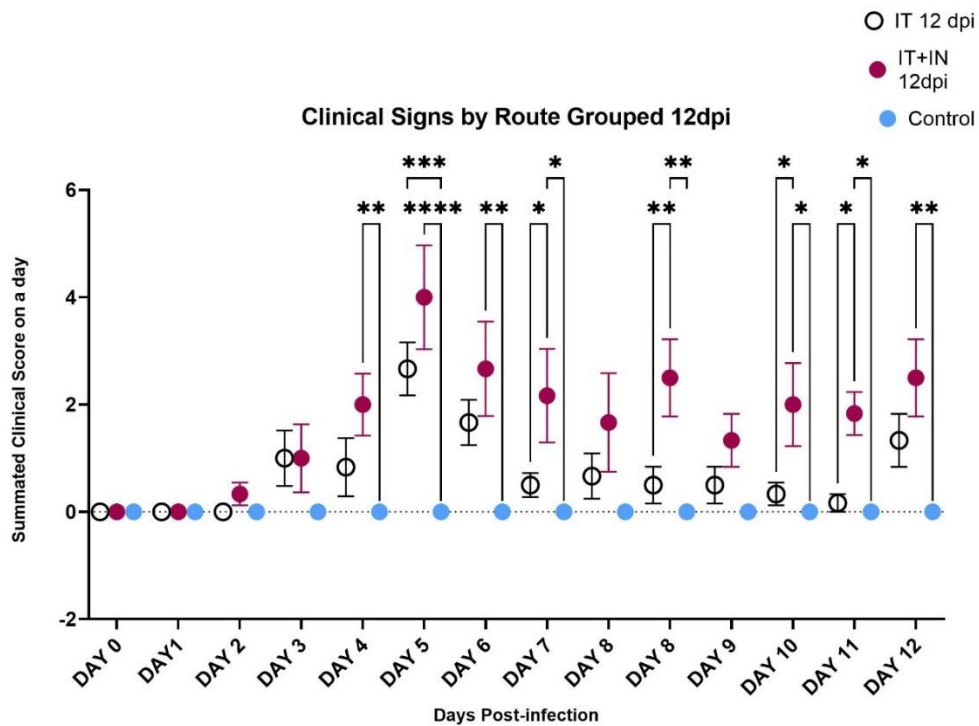

**Figure S3. Clinical signs of SARS-CoV-2 cats by inoculation route.** The x-axis indicates the days post-infection of the SARS CoV-2 Delta variant in cats. The y-axis shows clinical signs summated for a particular day from all the infected cats **(A)** Clinical signs recorded for both the IT route and IT+IN route in Phase1 ( 4dpi) show a significant increase in clinical signs in IT+IN inoculated cats compared to cats inoculated by the IT Only route on day 4 ( $p = 0.0013$ ). **(B)** Clinical signs observed in Phase2 (12 dpi) are significantly increased in the IT+IN- inoculated cats compared to cats inoculated by the IT Only group on days 6, 10, and 11 ( $p= 0.0263$ ). \* $p < 0.05$ , \*\* $p < 0.01$ , \*\*\* $p < 0.001$ , \*\*\*\* $p < 0.0001$

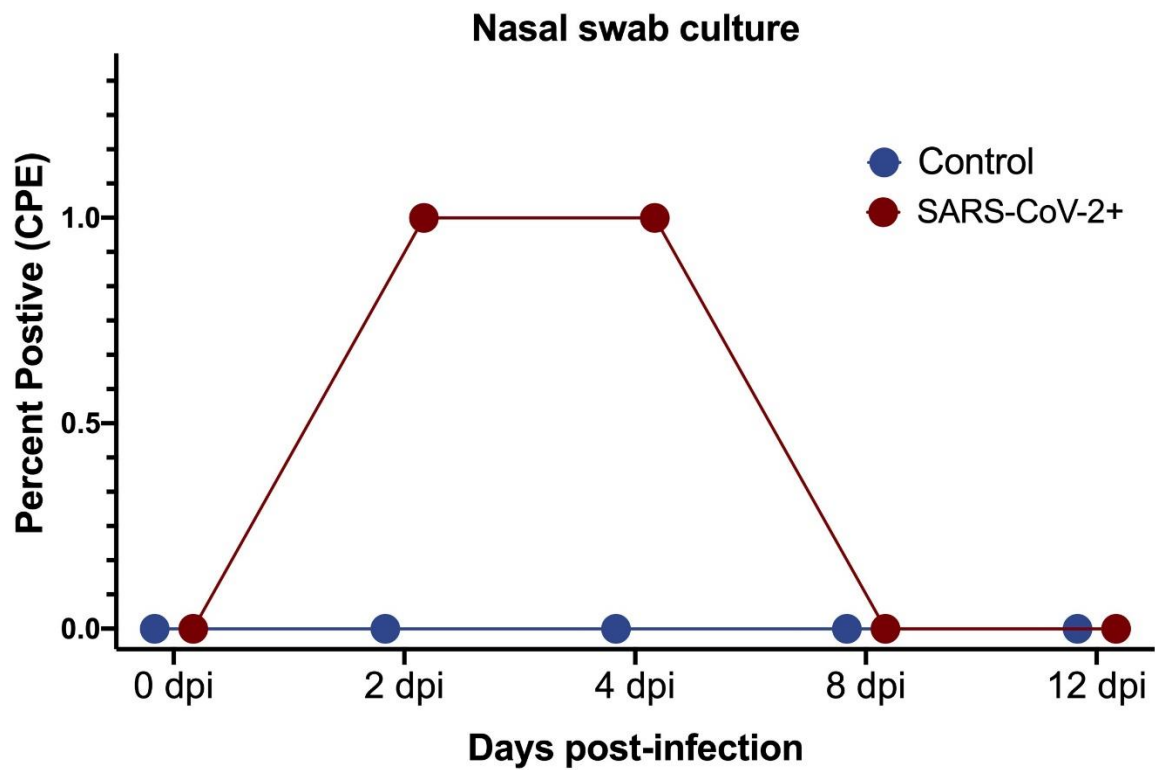

**Figure S4. Virus isolation from nasal swabs during SARS-CoV-2 infection.** Infectious virus was recovered from all SARS-CoV-2 (Delta) infected cats in both Phase 1 and Phase 2 of this study. Cytopathic effects were detected in cell cultures inoculated with nasal swab samples collected at 2 and 4 dpi (n=24) as compared to CPE in positive control wells.

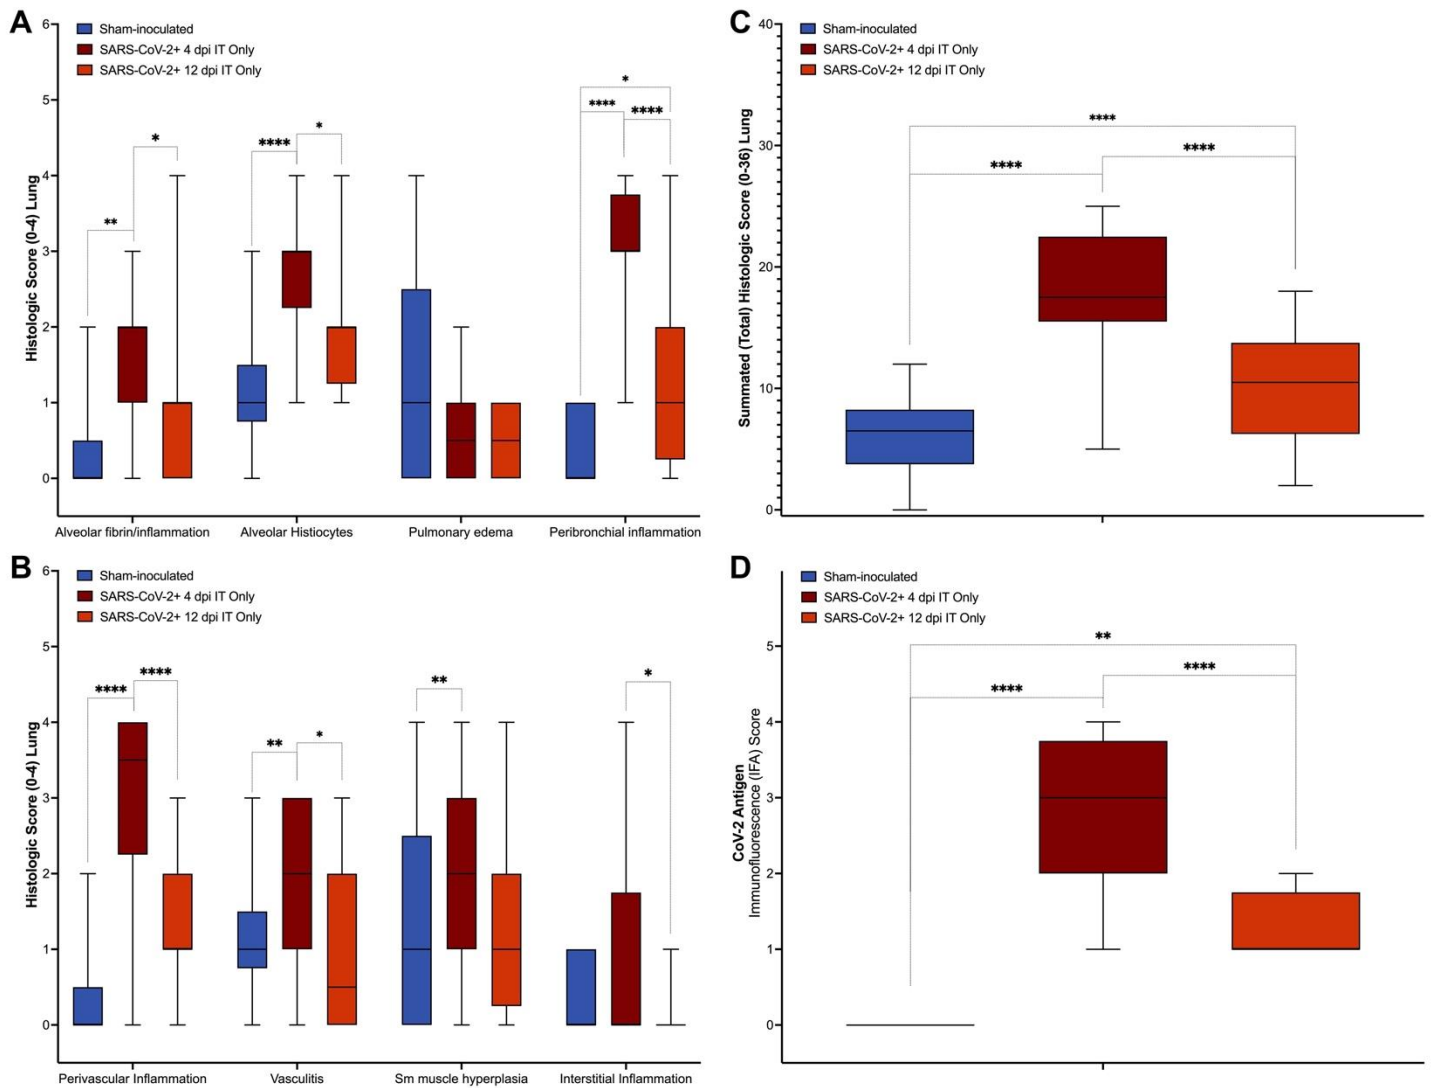

**Figure S5. Histologic and immunofluorescent scoring of lung tissues in SARS-CoV-2 infected animals. (A-B)** When looking at individual pathologic features, alveolar inflammation ( $p<0.05$ ), alveolar histiocytosis ( $p<0.01$ ), and peribronchial inflammation ( $p<0.0001$ ) were significantly increased in cats at 4 dpi compared to uninfected cats, as well as perivascular inflammation ( $p<0.0001$ ) and vasculitis ( $p<0.05$ ). Perivascular inflammation ( $p<0.001$ ) and peribronchial inflammation ( $p<0.001$ ) were also significantly elevated in SARS-CoV-2 infected cats at 4 dpi compared to 12 dpi. **(C)** Total lung pathology was more severe in delta-infected cats at 4 dpi compared to 12 dpi ( $p<0.0001$ ) and uninfected controls ( $p<0.0001$ ). Quantification of IFA fluorescent intensity revealed that the presence of viral antigen was significantly increased in CoV-2 infected cats at 4dpi when compared to uninfected controls ( $p<0.0001$ ) and CoV-2 infected cats at 12 dpi ( $p<0.01$ ). \* $p<0.05$ , \*\* $p<0.01$ , \*\*\* $p<0.001$ , \*\*\*\* $p<0.0001$

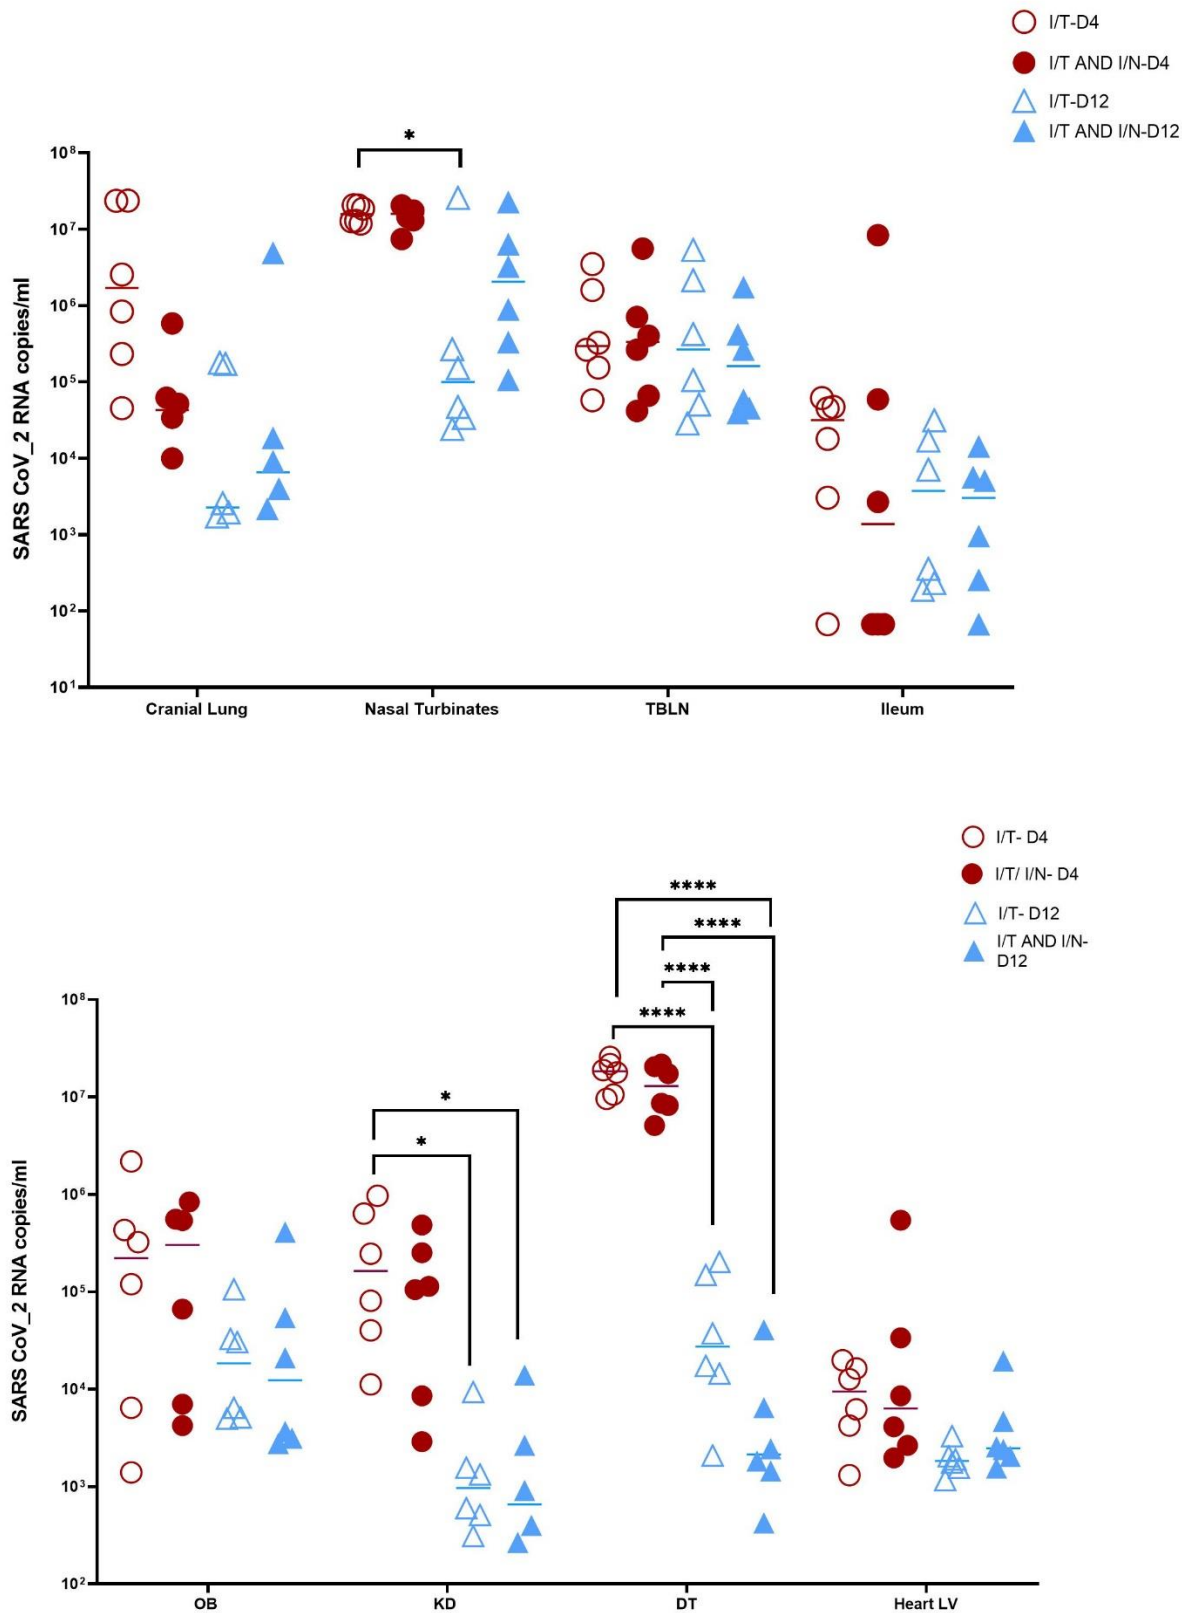

**Figure S6. SARS-CoV-2 viral loads in necropsy tissues by inoculation route.** Viral loads are significantly increased in the kidney ( $p=0.0478$ ) and nasal turbinates ( $p=0.0379$ ) of IT Only cats at 4 dpi compared to 12 dpi. In the distal trachea, there is a significant increase in viral load between 4 dpi and 12 dpi in both IN+IN ( $p < 0.0001$ ) and IT Only ( $p < 0.0001$ ) inoculated cats. No significant differences were observed between CoV-2-infected cats at either timepoint (4 dpi or 12 dpi) when evaluated by inoculation route (IN+IT vs IT Only). \* $p < 0.05$ , \*\* $p < 0.01$ , \*\*\* $p < 0.001$ , \*\*\*\* $p < 0.0001$

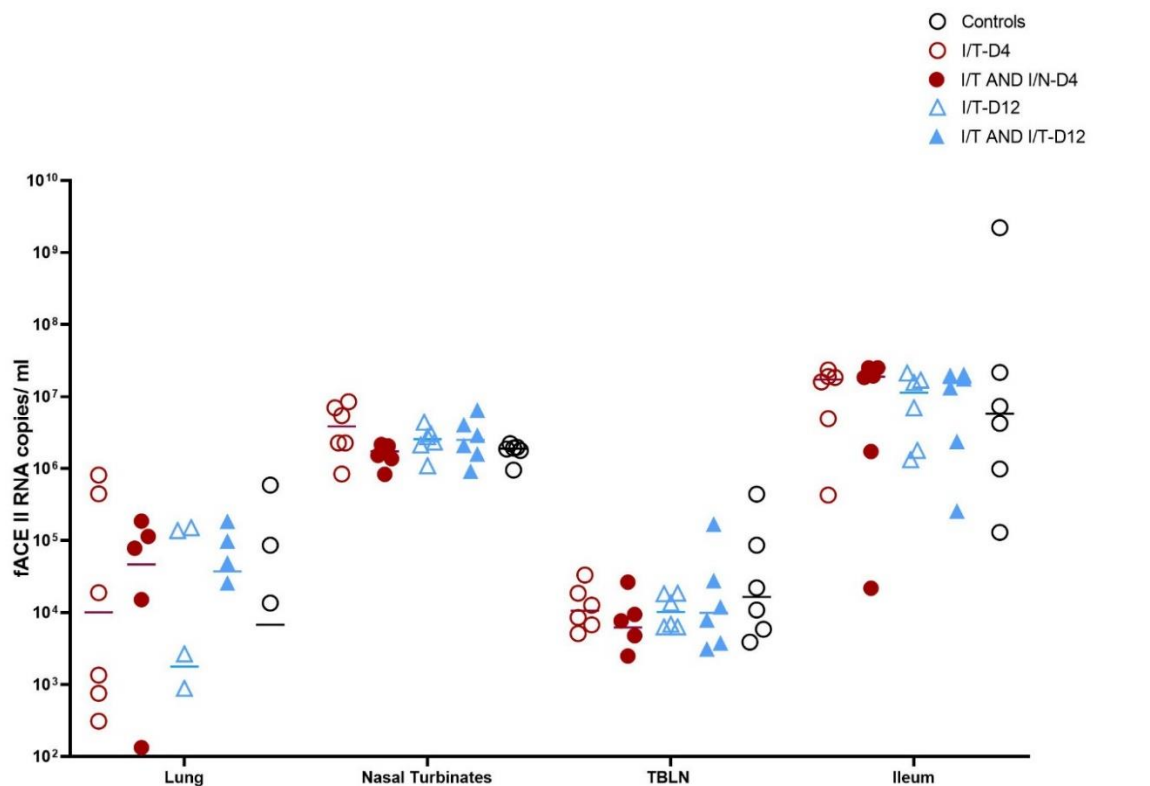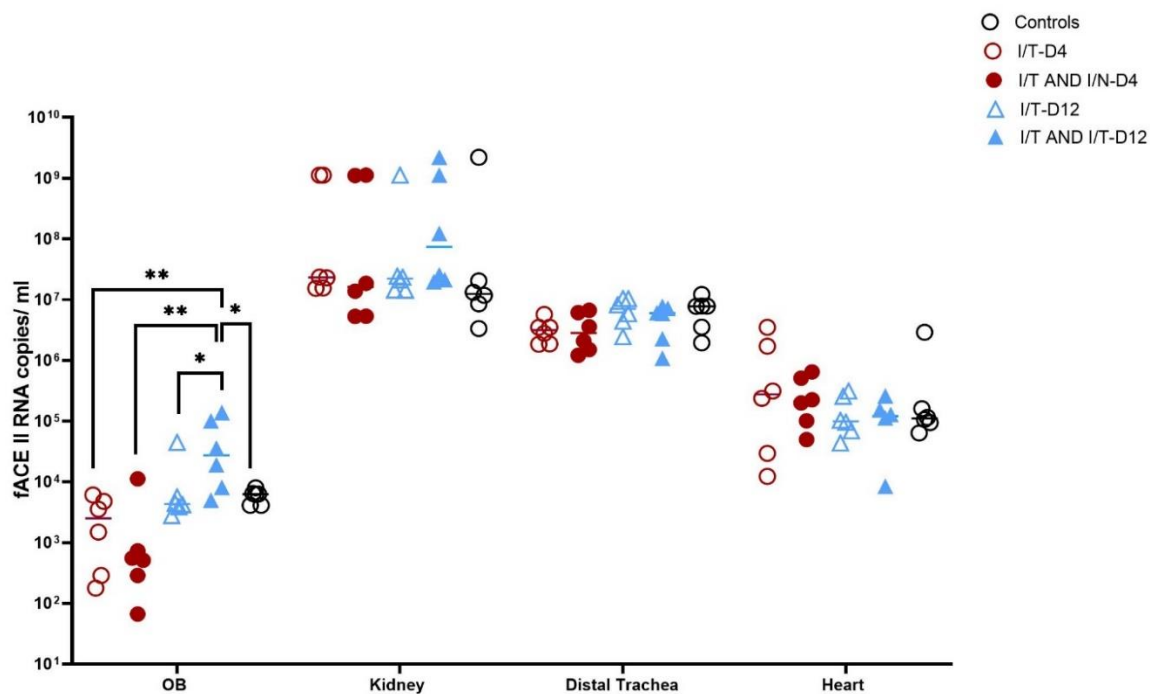

**Figure S7. Feline ACE2 expression in necropsy tissues by inoculation route.** f-ACE 2 expression categorized by the route of infection in each tissue showed increased f-ACE2 expression in olfactory bulb in IT+IN inoculated cats on 12 dpi compared to IT+IN inoculated cats at 4 dpi ( $p=0.0097$ ). Increased f-ACE2 expression was also observed in IT Only inoculated cats at 4 dpi compared to IT+IN inoculated cats at 12 dpi ( $p=0.0102$ ), as well as IT+IN inoculated cats at 12 dpi.  $*p<0.05$ ,  $**p<0.01$ ,  $***p<0.001$ ,  $****p<0.0001$



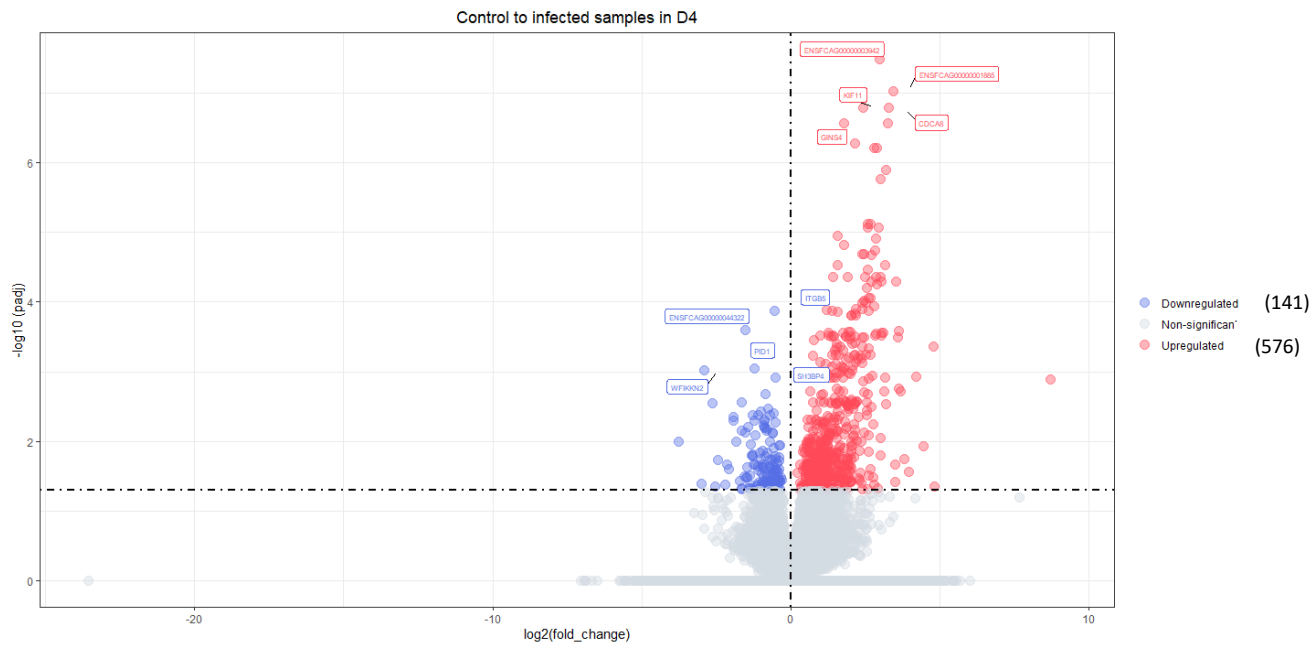

**Figure S8A. Differentially expressed genes in control animals compared to CoV-2+ samples at 4 dpi.** The volcano plot showing comparison of differentially expressed genes in control and Phase 1 infected samples. The genes upregulated at 4 dpi compared to controls are shown in red, whereas the genes downregulated on 4 dpi are highlighted in blue .

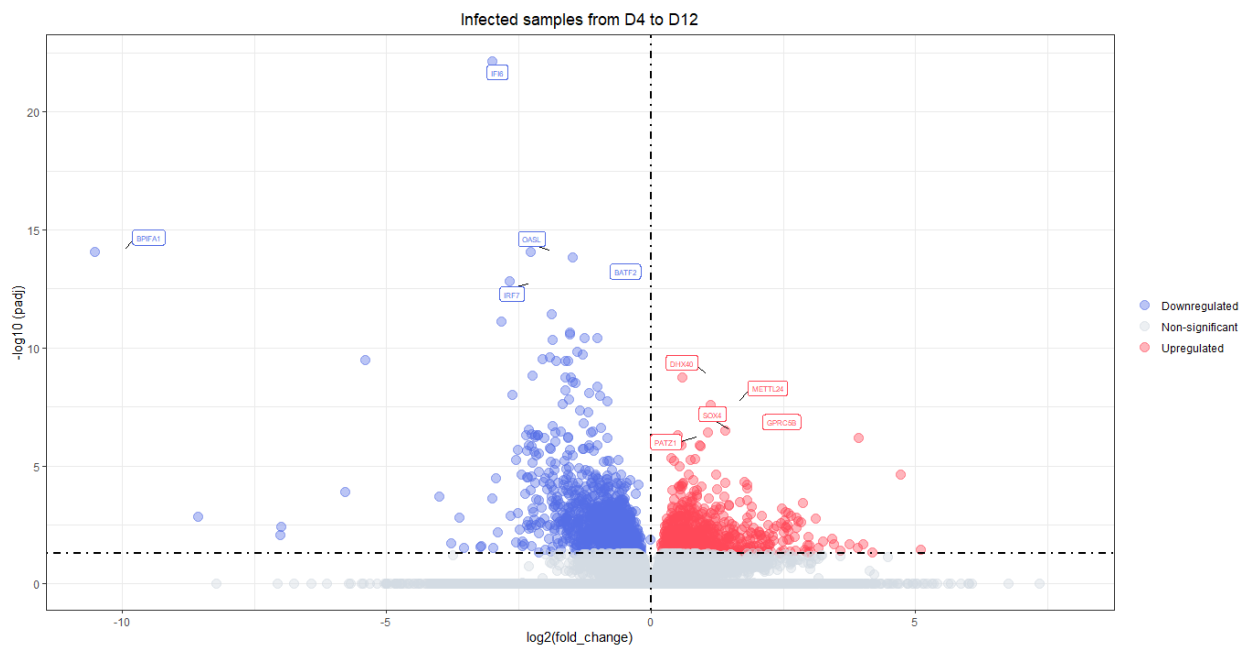

**Figure S8B. Differentially expressed genes in CoV-2+ samples at 4 dpi compared to 12 dpi.** The volcano plot showing comparison of differentially expressed genes in Phase 1 and Phase 2 infected samples. The genes upregulated at 12 dpi compared to 4 dpi are shown in red, whereas the genes downregulated on 12 dpi are highlighted in blue .



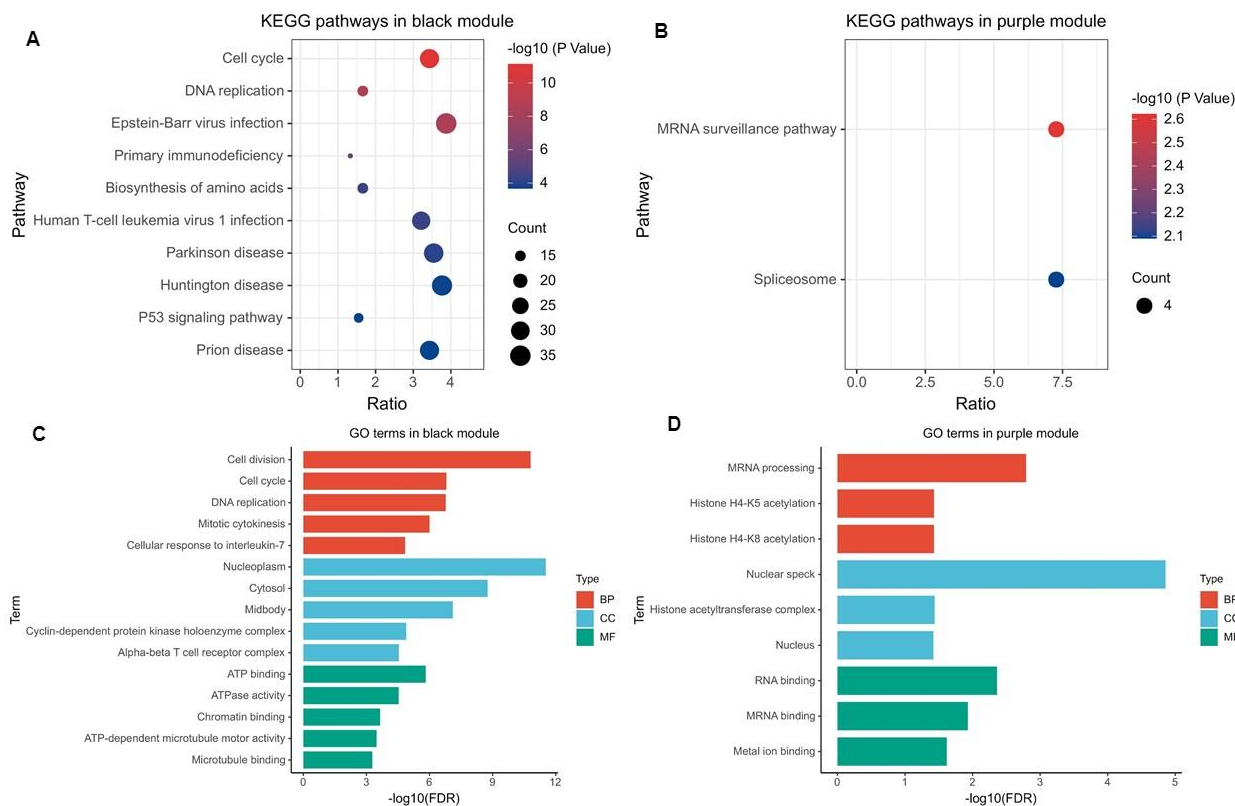

**Fig S10. KEGG pathway and gene ontology term enrichment based on genes in black (A and C) and purple (B and D) modules.** (A-B) KEGG Pathway analysis with DEG's of black and purple module - x-axis explains the ratio of the number of differentially expressed genes in a specific pathway compared to the total genes in a particular pathway. The y-axis is the name of the pathway involved. (C-D) GO enrichment analysis results. The x-axis shows the adjusted p-values (FDR) algorithm in each term and the y-axis represents the GO name.
